# Supplementary material for: Antibodies to Plasmodium vivax reticulocyte binding protein 2b are associated with protection against P. vivax malaria in populations living in low malaria transmission regions of Brazil and Thailand
Source: PLoS Negl Trop Dis. 2019 Aug 19;13(8):e0007596. doi: 10.1371/journal.pntd.0007596 (PMC6726234; doi:10.1371/journal.pntd.0007596)
Supplement: S1 Table — Note. For continuous quantities, Student t test was used to test for differences between the means of the groups, while chi-square test was performed to analyze the proportion differences of binary variables. P<0.05 was deemed significant. Abbreviation: molFOB = the molecular force of blood-stage infection. (XLSX) [file pntd.0007596.s002.xlsx]

## Sheet: old
	S1 Table. The epidemiological differences between the population with and without asymptomatic infection on enrollment for the two cohort studies.
	Characteristics	P. vivax infection (Brazilian study)		P Values	P. vivax infection (Thai study)		P Values
		Negative (1124)	Positive (39)		Negative (945)	Positive (28)
	Age	29.3±21.8	34.4±20.3	0.148	26.5±19.4	25.5±13.8	0.789
	Male (%)	50.09	64.1	0.085	45.43	71.43	0.007
	Pregnant (%)	1.51	10.26	<0.001	1.05	3.57	0.212
	Usage of bednet (%)	43.77	51.28	0.353	88.96	85.71	0.591
	molFOB	0.354±0.937	1.303±1.346	<0.001	0.147±0.735	3.362±2.981	<0.001
	Indoor spray (%)	-	-	-	73.92	57.14	0.048
	Times sleep in Myanmar	-	-	-	1.298±2.48	3.5±3.07	<0.001
	Note. Student t test was used to calculate the mean difference of continuous variables, while chi-square test was performed to analyze the proportion differences of binary variables.
	P < 0.05 was deemed significant. Abbreviation. molFOB: the molecular force of blood-stage infection.
		Brazilian study					Thail study
		n	N	%	P Values		n	N	%	P Values
	Total
	Age distribution
	<25
	>=25
	Sex
	Male
	Female
	Pregnancy
	No
	Yes
	Usage of bednet
	No
	Yes
	molFOB distribution
	0-0.38
	>=0.38
	Indoor spray
	No
	Yes
	Number of staying overnight in Myanmar
	0
	1-2
	>=2

## Sheet: revised1
	S1 Table. The epidemiological differences between the population with and without asymptomatic infection on enrollment for the two cohort studies.
	Subgroups	Brazilian study					Thai study
		n	N	%	P value		n	N	%	P value
	Total	39	1163	3.4			28	973	2.9
	Age distribution
	<25	13	581	2.2	0.035		14	504	2.8	0.847
	>=25	26	582	4.5			14	469	3
	Sex
	Women	14	575	2.4	0.085		8	525	1.5	0.006
	Men	25	588	4.3			20	448	4.5
	Pregnancy
	No	35	1142	3.1	0.004		27	962	2.8	0.276
	Yes	4	21	19			1	11	9.1
	Usage of bednet
	No	19	651	2.9	0.353		4	107	3.7	0.538
	Yes	20	512	3.9			24	866	2.8
	molFOB distribution
	0-0.38	15	928	1.6	<0.001		7	893	0.8	<0.001
	>=0.38	24	235	10.2			21	80	26.2
	Indoor spray
	No						12	259	4.6	0.049
	Yes						16	714	2.2
	Number of staying overnight in Myanmar
	0						5	608	0.8	<0.001
	1-2						9	181	5
	>=3						14	184	7.6
	Note. n=number of PCR positive cases, N=total number of participants in the study. Chi-square test was used to test the difference of proportions while Fisher exact test was performed if any cell is less than 5.
